# Supplementary material
Source: PubMed Central journal article supplement (PMC7223688)
Supplement: 253_2019_10316_MOESM1_ESM.pdf [file 253_2019_10316_MOESM1_ESM.pdf]

**Oral delivery of *Bacillus subtilis* spores expressing *Clonorchis sinensis* paramyosin protects *grass carp* from cercaria infection**

Hengchang Sun<sup>a,b,c,d,1</sup>, Mei Shang<sup>a,b,c,d,1</sup>, Zeli Tang<sup>f</sup>, Hongye Jiang<sup>b,c,d</sup>, Huimin Dong<sup>a</sup>, Xinyi Zhou<sup>b,c,d</sup>, Zhipeng Lin<sup>b,c,d</sup>, Cunbin Shi<sup>e</sup>, Pengli Ren<sup>b,c,d</sup>, Lu Zhao<sup>b,c,d</sup>, Mengchen Shi<sup>b,c,d</sup>, Lina Zhou<sup>b,c,d</sup>, Houjun Pan<sup>e</sup>, Ouqin Chang<sup>e</sup>, Xuerong Li<sup>b,c,d</sup>, Yan Huang<sup>b,c,d\*</sup>, Xinbing Yu<sup>b,c,d\*</sup>

<sup>a</sup> Department of Laboratory Medicine, The Third Affiliated Hospital, Sun Yat-sen University, Guangzhou, China;

<sup>b</sup> Department of parasitology, Zhongshan School of medicine, Sun Yat-sen University, Guangzhou, China;

<sup>c</sup> Key Laboratory for Tropical Diseases Control, Sun Yat-sen University, Ministry of Education, Guangzhou, Guangdong, China

<sup>d</sup> Provincial Engineering Technology Research Center for Biological Vector Control, Guangzhou, Guangdong 510080, China

<sup>e</sup> Key Laboratory of Fishery Drug Development, Ministry of Agriculture, Pearl River Fisheries Research Institute, Chinese Academy of Fishery Sciences, Guangzhou, Guangdong, China

<sup>f</sup> Department of Cell Biology and Genetics, School of Pre-clinical Medicine, Guangxi Medical University, Nanning, 530021, China

\* Corresponding author. Department of Parasitology, Zhongshan School of Medicine, Sun Yat-sen University, Guangzhou, China. Key Laboratory for Tropical Diseases Control, Sun Yat-sen University, Ministry of Education, Guangzhou, Guangdong, China.

E-mail addresses: [yuxb@mail.sysu.edu.cn](mailto:yuxb@mail.sysu.edu.cn) (X. Yu), [huang66@mail.sysu.edu.cn](mailto:huang66@mail.sysu.edu.cn) (Y. Huang)

<sup>1</sup> These authors contributed equally to this work

**Table S1 Genes and primers sequences used for RT-PCR**

| Gene          |   | Sequences of primers    | Accession number |
|---------------|---|-------------------------|------------------|
| ZO-1          | F | AAACTGTCGAGAGAGAAGCCT   | KJ000055         |
|               | R | AGAGCCTGGTCCTCATGTTCTT  |                  |
| Occludin      | F | ATGAGCTGCCTGTGCGTAG     | KF193855         |
|               | R | GGCGTAGTCTGTGTCACGAT    |                  |
| Claudin b     | F | AGCCAACGTCGTCATCCAAG    | KF193860         |
|               | R | GCATCAGAGCGAGGGGTAGC    |                  |
| Claudin c     | F | GTACCCGCCACAAAGTCGTA    | KF193859         |
|               | R | ACAATGGACACCGAACAAAACAA |                  |
| IgM           | F | AGAGAAGGAACGCTGACGTG    | DQ417927         |
|               | R | GTCTCCATGGGCTGTGGTAG    |                  |
| IgZ           | F | GGCTGTCTGGCCTCTGATTC    | GQ429175.1       |
|               | R | TGGTACGCTGCATCACAAGT    |                  |
| TNF- $\alpha$ | F | CAAACCTGCTCACCGAGACGA   | HQ696609.1       |
|               | R | TGCAGTGGAAGCTCAGGAAA    |                  |
| IL-8          | F | CCCTACTGCTCCCTGGGTTA    | JN663841         |
|               | R | AACCAAGCAGAATGGTGCAG    |                  |

**Table S2 LC-MS/MS identification results of the protein from B.s-CotC-CsPmy spores**

| Sample         | Score | Mass  | Matches   | Sequence | emPAI | Accseeion Number | Protein name                     |
|----------------|-------|-------|-----------|----------|-------|------------------|----------------------------------|
| B.s-CotC-CsPmy | 5048  | 99443 | 1144(305) | 145(77)  | 83.54 | gi 374434365     | Paramyosin( <i>C. sinensis</i> ) |

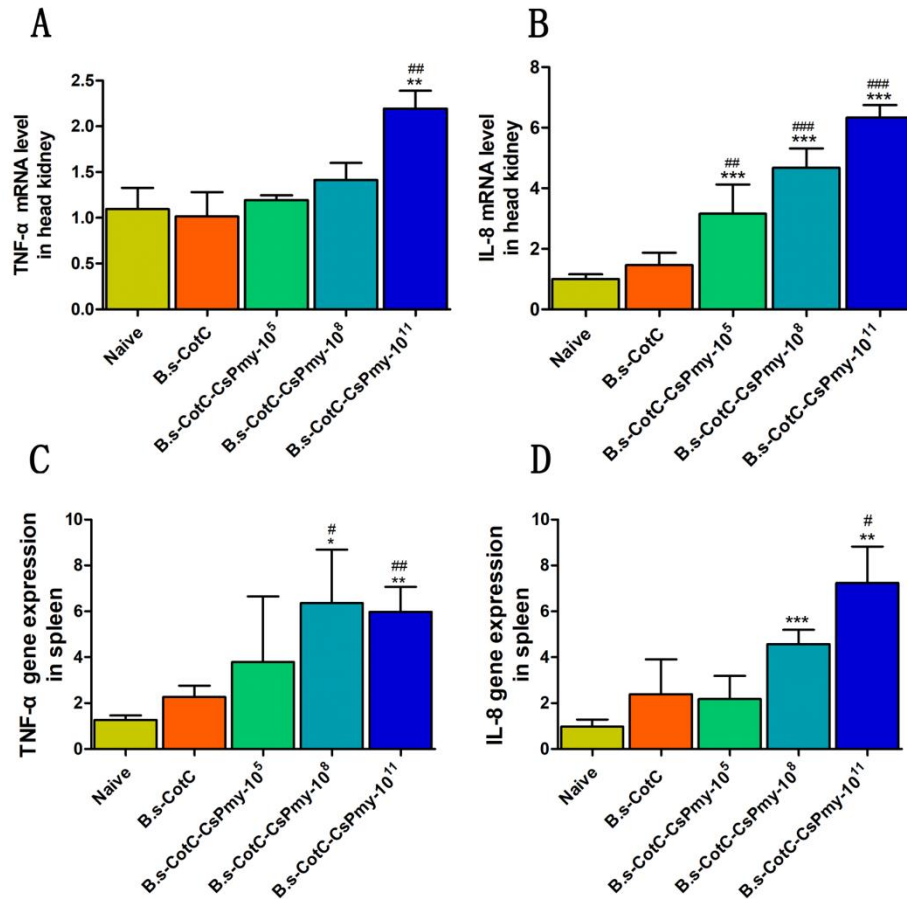

**Fig. S1 Relative mRNA levels of TNF- $\alpha$  and IL-8 in head kidney and spleen 6 weeks after the beginning of the immunization.** (A) TNF- $\alpha$  in head kidney; (B) IL-8 in head kidney; (C) TNF- $\alpha$  in spleen; (D) IL-8 in spleen. Naive, basal diet group; B.s-CotC-10<sup>8</sup>: basal diet plus 1 $\times$ 10<sup>8</sup> CFU/g B.s-CotC spores. B.s-CotC-CsPmy-10<sup>5</sup>, 10<sup>8</sup>, 10<sup>11</sup>, basal diet plus 10<sup>5</sup>, 10<sup>8</sup>, 10<sup>11</sup> CFU/g B.s-CotC-CsPmy spores, respectively. \* $P$  < 0.05, \*\* $P$  < 0.01, \*\*\* $P$  < 0.001 (compared with naive group); # $P$  < 0.05, ##  $P$  < 0.01, ###  $P$  < 0.001 (compared with B.s-CotC-10<sup>8</sup> group).

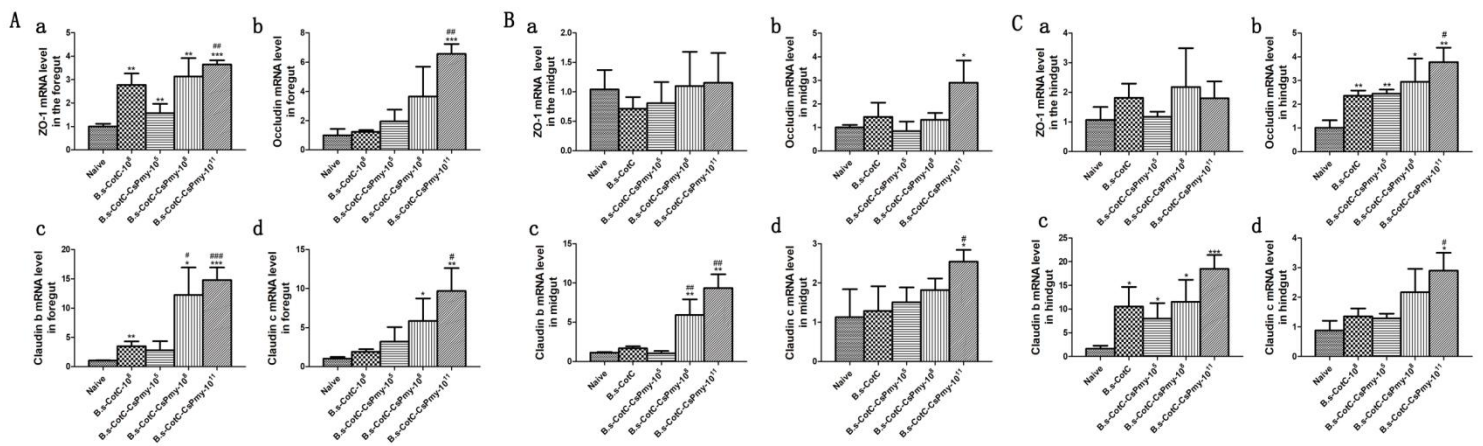

**Fig. S2 Transcriptional levels of genes encoding tight junction proteins in different intestinal segments.**

The relative transcriptional levels were analyzed by qRT-PCR at 6 weeks after the beginning of the immunization. (A) foregut, (B) midgut, (C) hindgut. (a) ZO-1, (b) occludin, (c) claudin b, (d) claudin c. Naive, basal diet group; B.s-CotC-10<sup>8</sup>: basal diet plus 1×10<sup>8</sup> CFU/g B.s-CotC spores. B.s-CotC-CsPmy-10<sup>5</sup>, 10<sup>8</sup>, 10<sup>11</sup>, basal diet plus 10<sup>5</sup>, 10<sup>8</sup>, 10<sup>11</sup> CFU/g B.s-CotC-CsPmy spores, respectively. \**P* < 0.05, \*\**P* < 0.01 (compared with naive group); #*P* < 0.05, ##*P* < 0.01 (compared with B.s-CotC-10<sup>8</sup> group).
